# Supplementary material for: Exercise, Mediterranean Diet Adherence or Both during Pregnancy to Prevent Postpartum Depression—GESTAFIT Trial Secondary Analyses
Source: MDPI journal article supplement (doi:10.3390/ijerph192114450), 2022-11-04
Supplement: s1 [file s1]

## **Supplementary Material**

Supplement to: **“Exercise, Mediterranean diet adherence or both during pregnancy to prevent postpartum depression. GESTAFIT trial secondary analyses”**.

**Table of contents**

**Supplementary Figure S1.** Flow diagram of the study participants.

**Supplementary Table S1.** Inclusion and exclusion criteria in the GESTAFIT project.

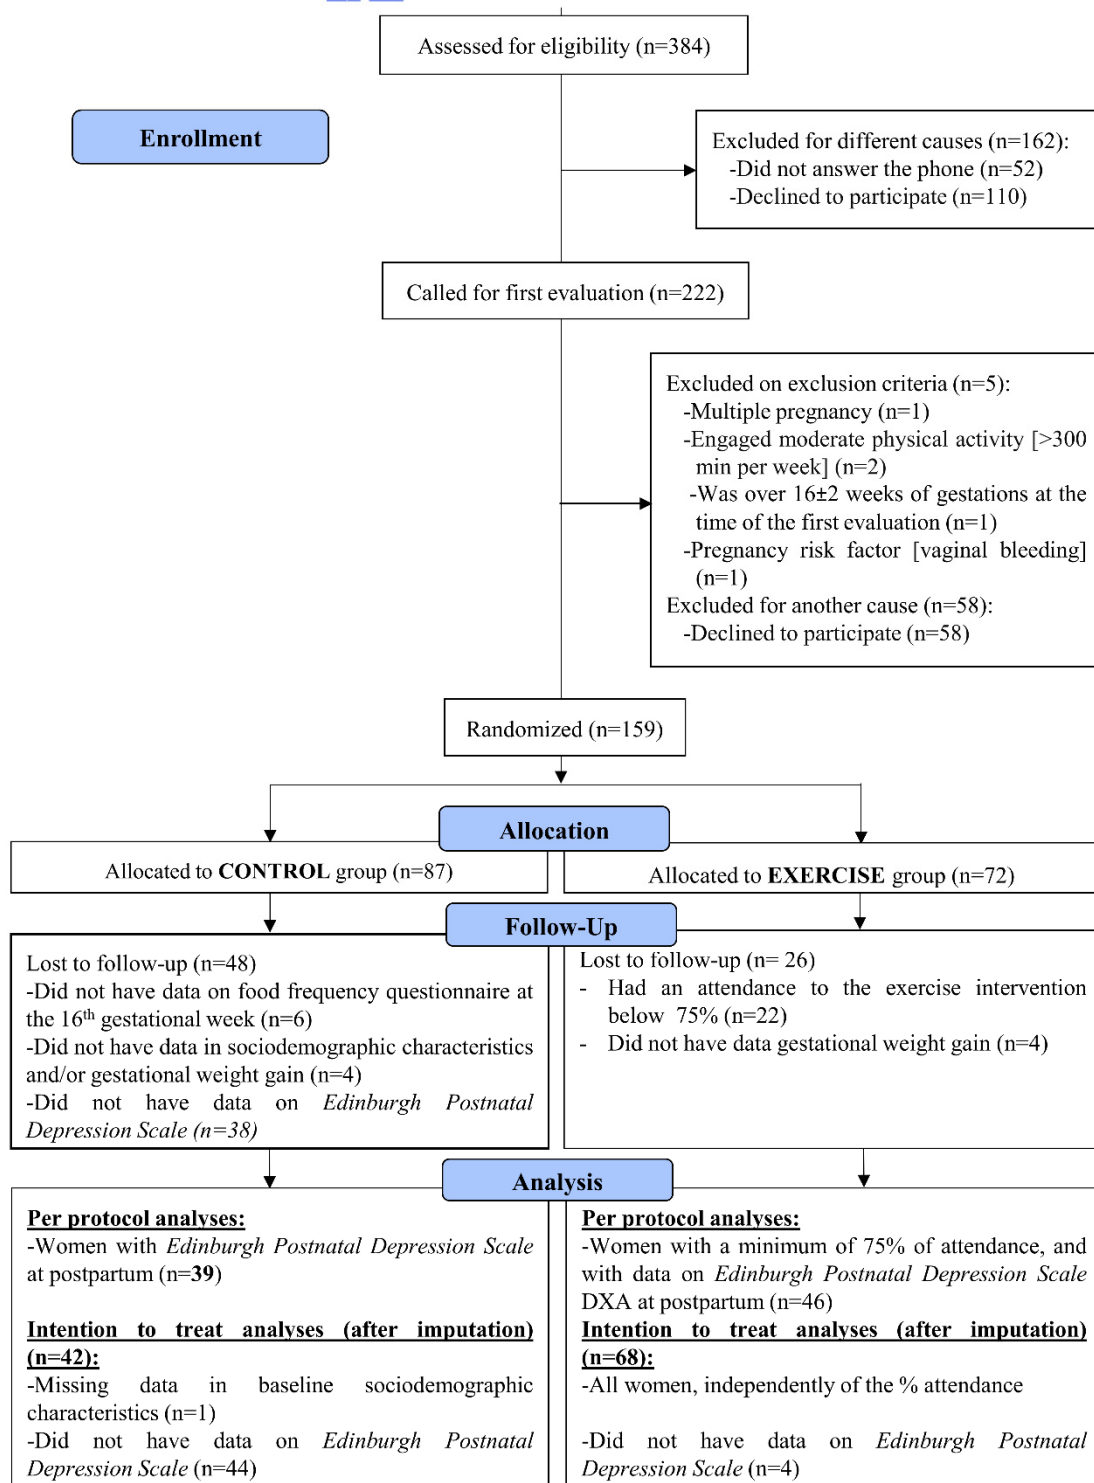

**Supplementary Figure S1.** Flow diagram of the study participants.

**Supplementary Table S1.** Inclusion and exclusion criteria in the GESTAFIT project.

|                                                                                                                                                                                                                                                                                                                                                                                                                                                                                                                                                                                                                                                                                                                                                                                                                                                                                                                                                                                                                      |
|----------------------------------------------------------------------------------------------------------------------------------------------------------------------------------------------------------------------------------------------------------------------------------------------------------------------------------------------------------------------------------------------------------------------------------------------------------------------------------------------------------------------------------------------------------------------------------------------------------------------------------------------------------------------------------------------------------------------------------------------------------------------------------------------------------------------------------------------------------------------------------------------------------------------------------------------------------------------------------------------------------------------|
| <b>Inclusion criteria</b>                                                                                                                                                                                                                                                                                                                                                                                                                                                                                                                                                                                                                                                                                                                                                                                                                                                                                                                                                                                            |
| <ul style="list-style-type: none"><li>- Pregnant women aged 25-40 years old with a normal pregnancy course.</li><li>- Answering “no” to all questions on the PARmed-X for pregnancy.</li><li>- Being able to walk without assistance.</li><li>- Being able to read and write properly.</li><li>- Informed consent: Being capable and willing to provide written consent.</li></ul>                                                                                                                                                                                                                                                                                                                                                                                                                                                                                                                                                                                                                                   |
| <b>Exclusion criteria</b>                                                                                                                                                                                                                                                                                                                                                                                                                                                                                                                                                                                                                                                                                                                                                                                                                                                                                                                                                                                            |
| <ul style="list-style-type: none"><li>- Having acute or terminal illness.</li><li>- Having malnutrition.</li><li>- Being unable to conduct tests for assessing physical fitness or exercise during pregnancy.</li><li>- Having pregnancy risk factors (such as hypertension, type 2 diabetes, etc.).</li><li>- Having a multiple pregnancy.</li><li>- Having chromosopathy or foetal malformations.</li><li>- Having uterine growth restriction.</li><li>- Having foetal death.</li><li>- Having upper or lower extremity fracture in the past 3 months.</li><li>- Suffering neuromuscular disease or presence of drugs affecting neuromuscular function.</li><li>- Being registered in another exercise program.</li><li>- Performing more than 300 minutes of at least moderate physical activity per week.</li><li>- Being engaged in another physical exercise program</li><li>- Being unwilling either to complete the study requirements or to be randomized into the control or intervention group.</li></ul> |
